# Supplementary material for: Effects of Rearing Aviary Style and Genetic Strain on the Locomotion and Musculoskeletal Characteristics of Layer Pullets
Source: MDPI journal article supplement (doi:10.3390/ani11030634), 2021-02-27
Supplement: s1 [file s1]

**Table S2.** Ages at which measures were taken and hours of light provided across all visits

| Flock | Visit 1                     |                            |                | Visit 2                     |                            |                | Visit 3                        |                             |                            |                |                                |
|-------|-----------------------------|----------------------------|----------------|-----------------------------|----------------------------|----------------|--------------------------------|-----------------------------|----------------------------|----------------|--------------------------------|
|       | Age weights<br>taken (days) | Age videos<br>taken (days) | Hours<br>Light | Age weights<br>taken (days) | Age videos<br>taken (days) | Hours<br>Light | Age Birds<br>euthanized (days) | Age weights<br>taken (days) | Age videos<br>taken (days) | Hours<br>Light | Age Birds<br>euthanized (days) |
| 1A    | 40                          | 41                         | 10             | 73                          | 74                         | 9              | 75                             | 119                         | 120                        | 10             | 119                            |
| 1B    | 39                          | 40                         | 13             | 65                          | 66                         | 11             | 65                             | 106                         | 107                        | 11             | 106                            |
| 1C    | 20                          | 21                         | 19             | 61                          | 62                         | 9              | .                              | 105                         | 112                        | 10             | .                              |
| 1D    | 20                          | 21                         | 19             | 61                          | 62                         | 9              | .                              | 105                         | 112                        | 10             | .                              |
| 1E    | 16                          | 17                         | 19             | 56                          | 57                         | 9              | 56                             | 97                          | 108                        | 10             | .                              |
| 2A    | 23                          | 24                         | 12             | 72                          | 73                         | 10             | 73                             | 115                         | 116                        | 10.5           | 115                            |
| 2B    | 21                          | 22                         | 8              | 66                          | 67                         | 8              | 67                             | 112                         | 113                        | 10             | 112                            |
| 2C    | 19                          | 20                         | 16             | 70                          | 71                         | 9              | 70                             | 112                         | 113                        | 9              | 112                            |
| 2D    | 23                          | 24                         | 14             | 69                          | 70                         | 10             | 69                             | 111                         | 112                        | 10             | 111                            |
| 2E    | 25                          | 26                         | 13             | 70                          | 71                         | 9              | 70                             | 112                         | 113                        | 9.5            | 113                            |
| 3A    | 25                          | 26                         | 16             | 62                          | 63                         | 11             | 63                             | 109                         | 109                        | 11             | 108                            |
| 3B    | 25                          | 26                         | 14             | 67                          | 68                         | 9              | 68                             | 113                         | 114                        | 9              | 113                            |
| 3C    | 27                          | 28                         | 15             | 70                          | 71                         | 10             | 71                             | 108                         | 109                        | 10             | 108                            |
| 3D    | 23                          | 24                         | 8              | 70                          | 71                         | 8              | 71                             | 111                         | 112                        | 8              | 111                            |
| 3E    | 28                          | 29                         | 14             | 71                          | 72                         | 11             | 72                             | 109                         | 110                        | 11             | 110                            |
